# Supplementary material
Source: publisher site journal article supplement (https://www.dovepress.com/article/100675)
Supplement: Supplementary file 1 [file get_supplementary_file.php]

# **The list of Ethical Review Board (ERB) for the B1J-MC-B019 observational study**

## **AUSTRIA**

Ethikkommission für das Bundesland Salzburg

## **CHINA**

ERB of First medical college of Haerbin University  
ERB of People hospital of Wuhan University  
ERB of Second hospital of Soochow University  
ERB of Shandong Mental health Center  
ERB of Sixth University of Beijing University  
ERB of Shanghai Mental health Center  
ERB of Guangzhou First People hospital  
ERB of Beijing Anding hospital of Capital medical University

## **HONG KONG**

Institutional Review Board of the University of Hong Kong/Hospital Authority Hong Kong West Cluster (HKU/HA HKW IRB)

## **ISRAEL**

Shalvata hospital ERB  
Sheba M.C. ERB  
Rambam M.C. ERB  
Abarbanel hospital ERB  
Soroka M.C. ERB

## **MALAYSIA**

Medical Ethics Committee, Universiti Malaya Medical Centre

## **MEXICO**

Mexico Centre for Clinical Research S.A. de C.V.

## **PHILIPPINES**

Makati Medical Institutional Review Board, Makati, Luzon  
The Medical City Institutional Review Board, Ortigas Avenue, Pasig City, Metro Manila  
St Luke's Institutional Ethics Review Committee, Quezon City, Luzon

## **SAUDI ARABIA**

Medicare Specialist Clinics, Riyadh

## **SINGAPORE**

NHG Domain Specific Review Board

## **TAIWAN**

Join Institutional review board, Taipei  
National Taiwan University Hospital (NTUH) Research Ethics Committee (REC), Taipei  
Institutional Review Board of Tri-Service General Hospital, Taipei

**THAILAND**

Srithanya Hospital, Nontaburi

**UNITED ARAB EMIRATES**

Psychiatry Hospital Abu Dhabi, Abu Dhabi
